# Supplementary material for: Molecular recognition in the solid state: topology of experimental and theoretical charge densities for tetrasulfur tetranitride
Source: Royal Society of Chemistry journal article supplement (doi:10.1039/a910209o), 2000-01-01
Supplement: a910209os1a.doc [file a910209os1a.doc]

**S1a: Experimental and Computational Details**

**Data collection.** Crystals of tetrasulfur tetranitride were obtained as orange prisms by slow evaporation of a chloroform solution. A well faced crystal with the dimensions 0.35 x 0.25 x 0.20 mm was glued to the tip of a 0.1 mm thin-walled capillary and mounted on a Nonius Kappa CCD detector system. The sample was cooled with an Oxford Cryostream System to 100.0(1) K in 2.5 h with a mean temperature gradient of -2 K/min. Preliminary examination and final data collection were carried out with graphite-monochromated MoK radiation (= 0.71073 Å) from a Nonius FR 591 rotating anode running at 50 kV and 80 mA. Intensity data were collected using 2° -scans with a detector distance of 40 mm. For the low order data two scan sets with 243 frames were collected at a scan angle of 17.5° and -15.25°  and a scan time of 40 seconds/frame. For the high order data six scan sets (375 frames in total) at -35° with a scan time of 60 seconds/frame were collected in addition to three scan sets (155 frames in total) at -45°  with a scan time of 120 seconds/frame.[[[1]](#footnote-2)a]

**Data reduction.** Crystal data for tetrasulfur tetranitride at 100 K: S4N4; Mr=184.32; *a* = 8.7286(4) Å, *b* = 7.0783(4) Å, *c* = 8.6377(4) Å,  = 93.7219(18)°, *V* = 532.54(5) Å3; monoclinic; *P* 21/n; *Z* = 4; *F*(000) = 368; *D*calc=2.299 g/cm3; **= 1.66 mm-1. The unit cell was determined from 30199 reflection positions. An initial orientation matrix was determined from 10 frames of the first scan set and refined during the integration of the individual scan sets. The intensities were first corrected for beam inhomogeneity and crystal decay by the program scalepack using a tight scale restraint (0.0001). During the scaling process 870 reflections with extreme  values (located at the detector edges) were omitted. An absorption correction was then applied (*A*min = 0.525, *A*max = 0.647) and symmetry equivalent and multiply measured reflections were averaged with SORTAV.[[[2]](#footnote-3)] After rejection of 2010 statistically discrepant reflections, the internal agreement factor was *R*int(*F*) = 3.8 % for a total of 32220 reflections yielding 6887 unique reflections. This data set provided 98.3% of data in 7.5 < 2< 110.4° (sin/< 1.156 Å-1) .

To increase the quality and completeness of the high order data and to remeasure some overloaded reflections at low diffraction angles a second crystal (0.35 x 0.23 x 0.20 mm) was measured at T = 100(1) K. The intensities were collected in 4 frame sets with a total of 548 frames. The detector arm was positioned at 0.0, 17.0 and 35.0°  with a scan time of 20, 40 and 120 seconds/frame. The intensities were corrected for decay, beam inhomogeneity and absorption effects (*A*min = 0.563, *A*max = 0.681). A total of 22404 reflections was measured with an internal agreement factor *R*int(*F*) = 2.4% for 5488 unique reflections. The datasets of the two different crystals were scaled together with SORTAV yielding 6108 unique reflections [5348 for *F*o > 2(*F*o)], [*R*int(*F*) = 2.28%] and a completeness of 99.8% of data in 6.4 < 2< 105.8° (sin /< 1.112 Å-1).

**Multipolar refinements and determination of the deformation density.** **Determination of the molecular geometry and multipolar refinements.** First an independent atom model (IAM) refinement was carried out, in which all atoms were treated as spherical. As a starting model the coordinates previously published by DeLucia and Coppens were used.[[[3]](#footnote-4)] Anisotropic temperature factors were introduced to describe the thermal motion of the sulfur and nitrogen atoms.[[[4]](#footnote-5)] The refinement finally converged at *R*1 = 0.041, *wR*2 = 0.075 and *GoF* = 1.156 for 6108 reflections and 73 parameters.

A multipole model was adopted to describe the deformation of (**r**) from a spherical distribution. According to a method proposed by Stewart,[[[5]](#footnote-6)] the electron density (**r**) in a crystal is described by a sum of aspherical pseudoatoms at the nuclear positions {**R**j}.

In the program XDLSM of XD[[[6]](#footnote-7)] the pseudoatom density j(**r-R**j) is expressed in terms of multipoles.

In this refinement the multipole expansion was truncated at the hexadecapole level (lmax = 4) for sulphur and nitrogen. Since the sulfur atoms in S4N4 lie on pseudo-mirror planes and the nitrogen atoms on pseudo 2-fold axes, only multipoles allowed by the site symmetries were used. Core, spherical valence and the radial functions for the deformation densities were single- Slater-type orbitals for S and N.[[[7]](#footnote-8)] Because of the pseudo-*D*2*d* symmetry of S4N4 all S and N atoms are symmetry-dependent and a full refinement without 'chemical constraints' produced large correlation coefficients for individual parameters with an unstable  refinement. Thus only one multipolar set for sulfur and one multipolar set for nitrogen were refined. A radial scaling (') for the spherical density was refined for each atom-type, together with a scaling ('') of the radial function for the deformation density. The '' parameters for the four sets of multipoles (1l4) were constrained to have the same values. With the experimental model this procedure refined to ' = 0.979 (6) and '' = 1.25 (4) for S and ' = 0.978 (4) and '' = 1.45 (14) for N. The '' = 1.45(14) value for N is rather large indicating a contracted deformation density for the N atoms. The final agreement factors were *R*1 = 0.025, *wR*2 = 0.033 and *GoF* = 1.628 for 4849 [*F*o > 3(*F*o)] reflections and 105 parameters.

Hirshfeld's rigid bond test[[[8]](#footnote-9)] was applied to the atomic displacement parameters obtained from the refinements. The difference between mean-square amplitudes (1.62-1.64.10-4 Å2) never exceeds the limit of 1.0.10-3, proposed by Hirshfield.

**Computational Details.** All multipolar refinements were carried out using the XD software package;[6] the quantity minimized was = *w*(Fo-Fc)2 based on 4849 reflections with *F*o > 3(*F*o ). Weights were taken as *w* = 1/2(*F*2). Convergence was assumed when a maximal shift/esd < 10-12 was achieved. For the topological analysis, critical points of the electron density were searched *via* a Newton Raphson algorithm implemented in XD. Properties of (**r**) and 2(**r**) were calculated after transformation of the local axis system into a global system. The experimental energy densities were derived semiquantitatively as recently proposed by Abramov.[[[9]](#footnote-10)]

*Ab initio* calculations at the Hartree-Fock (HF) and Møller-Plesset (MP2) levels of theory and DFT calculations using the Becke3LYP[[[10]](#footnote-11)] density functional were carried out with the GAUSSIAN98[[[11]](#footnote-12)]program suite (release A.3). Unless specified otherwise, the 6-311G(3df) basis set[[[12]](#footnote-13)] was our standard. Basis set information is listed in the Supporting Information (S6). The topological analysis of the theoretical electron densities was carried out with the AIM software package.[[[13]](#footnote-14)]

1. (a) 'Collect' data collection software; Nonius B.V., 1998. (b) Otwinowski, Z.; Minor, W. *Processing of X-ray Diffraction Data Collected in Oscillation Mode, Methods in Enzymology*, Volume 276: *Macromolecular Crystallography*, Part A, Carter, C. W., Jr., Sweet, R. M., Eds.; Academic Press: San Diego, CA, 1997; pp. 307-326. [↑](#footnote-ref-2)
2. Blessing, R. H. *Cryst. Rev*. **1987**, *1*, 3-57. [↑](#footnote-ref-3)
3. De Lucia, M. L.; Coppens, P. *Inorg. Chem*. **1978**, *17*, 2336-2338. [↑](#footnote-ref-4)
4. Sheldrick, G.M. 'SHELXL97'; program for crystal structure refinement; University of Göttingen, Germany, 1997. [↑](#footnote-ref-5)
5. Stewart, R. F. *Acta Crystallogr.* **1976**, *A32,* 565-574. [↑](#footnote-ref-6)
6. Koritsanszky, T.; Howard, S. T.; Su, Z.; Mallinson, P. R.; Richter, T.; Hansen, N. K. *XD, Computer Program Package for Multipole Refinement and Analysis of Electron Densities from Diffraction Data,* Free University of Berlin, Germany, June 1997. [↑](#footnote-ref-7)
7. Hansen, H. K.; Coppens, P. *Acta Crystallogr.* **1978**, *A34,* 909-921. [↑](#footnote-ref-8)
8. Hirshfeld, F. *Acta Crystallogr,* **1976**, *A32,* 239-244. [↑](#footnote-ref-9)
9. Abramov, Y. A. *Acta. Crystallogr.* **1997**, *A53*, 264-272. [↑](#footnote-ref-10)
10. (a) Becke, A. D. *J.* *Chem. Phys.* **1993**, *98,* 5648-5652. (b) Lee, C.; Yang, W.; Parr, R. G. *Phys. Rev.* **1988**, *B37,* 785-789. [↑](#footnote-ref-11)
11. Gaussian 98 (Revision A.7) Frisch, M. J.; Trucks, G. W.; Schlegel, H. B.; Scuseria, G. E.; Robb, M. A.; Cheeseman, J. R.; Zakrzewski, V. G.; Montgomery, J. A.; Keith, T.; Petersson, G. A.; Montgomery, J. A.; Stratmann, R. E., Burant, J. C.; Dapprich, S.; Millam, J. M.; Daniels, A. D.; Kudin, K. N.; Strain, M. C.; Farkas, O.; Tomasi, J.; Barone, V.; Cossi, M.; Cammi, R.; Mennucci, B.; Pomelli, C.; Adamo, C.; Clifford, S.; Ochterski, J.; Petersson, G. A.; Ayala, P. Y.; Cui, Q.; Morokuma, K.; Malick, D. K.; Rabuck, A. D.; Raghavachari, K.; Foresman, J. B.; Cioslowski, J.; Ortiz, J. V.; Stefanov, B. B.; Lui, G.; Liashenko, A.; Piskorz, P.; Komaromi, A.; Gomperts, R.; Martin, R. L.; Fox, D. J.; Keith, T.; Al-Laham, M. A.; Peng, C. Y.; Nanayakkara, A.; Gonzalez, C.; Challacombe, M.; Gill, P. M. W.; Johnson, B. G.; Chen, W.; Wong, M. W.; Andres, J. L.; Head-Gordon, M.; Replogle, E. S.; Pople, J. A. Gaussian, Inc., Pittsburgh PA, 1998. [↑](#footnote-ref-12)
12. (a) Krishnan, R.; Binkley, J. S.; Seeger, R.; Pople, J. A. *J. Chem Phys.* **1980**, *72*, 650-654. (b) McLean, A. D.; Chandler, G. S. *J. Chem. Phys.* **1980**, *72*, 5639-5648. [↑](#footnote-ref-13)
13. Bader, R. F. W. *Acc. Chem. Res.* **1985**, *18*, 9-15. [↑](#footnote-ref-14)
