# Supplementary material for: Molecular recognition in the solid state: topology of experimental and theoretical charge densities for tetrasulfur tetranitride
Source: Royal Society of Chemistry journal article supplement (doi:10.1039/a910209o), 2000-01-01
Supplement: a910209os2d.doc [file a910209os2d.doc]

**S2d:**

**Bondpaths in the monomeric and dimeric unit of S4N4 (experimental)**

**Bondpaths in the dimeric unit of S2N2 (theoretical)**
