# Supplementary material for: Molecular recognition in the solid state: topology of experimental and theoretical charge densities for tetrasulfur tetranitride
Source: Royal Society of Chemistry journal article supplement (doi:10.1039/a910209o), 2000-01-01
Supplement: a910209os5.doc [file a910209os5.doc]

**S5:** Local coordinate system for S4N4

The following local coordinate systems were adapted:

S1 [ x axis S1DUM0; y axis S1S3], S2 [ x axis S2DUM0; y axis S2S4], S3 [ x axis S3DUM0; y axis S3S1], S4 [ x axis S4DUM0; y axis S4S2], N1 [ z axis N1DUM0; y axis N1N3], N2 [ z axis N2DUM0; y axis N2N4], N3 [ z axis N3DUM0; y axis N3N1], N4 [ z axis N4DUM0; y axis N4N2]

The dummy atom (DUM0) is located in the centre of the S4N4 molecule [x, y, z: -0.0088, 0.7434, 0.1836]. For all sulphur atoms the z axes is located perpendicular to a mirror plane; for all nitrogen atoms the z axes are oriented along the pseudo-2-fold axes.
