# Supplementary material for: Molecular recognition in the solid state: topology of experimental and theoretical charge densities for tetrasulfur tetranitride
Source: Royal Society of Chemistry journal article supplement (doi:10.1039/a910209o), 2000-01-01
Supplement: a910209os6.doc [file a910209os6.doc]

**S6:** Gaussian Basis Sets Employed

**atom type nr basis orbitals contractions**

N AE*a* **I** (11s5p3d1f)/(4s3p3d1f) (6311/311/111/1)

S AE **I** (13s9p3d1f)/(6s5p3d1f) (631111/42111/111/1)

*a* All-electron basis set.
